# Supplementary material
Source: publisher site journal article supplement (doi:10.18632/aging.206379)
Supplement: Supplementary file 3 [file aging-v18i1-206379-supplementary-material-SD2.pdf]

## SUPPLEMENTARY TABLE

**Supplementary Table 1. R packages.**

| <b>Package name</b> | <b>Role</b>                                    | <b>Version</b> |
|---------------------|------------------------------------------------|----------------|
| oligo               | Pre-processing tools                           | 1.70.0         |
| arrayQualityMetrics | Chip quality control                           | 3.62.0         |
| ggplot2             | Graph creation                                 | 3.5.1          |
| Biobase             | Base functions for Bioconductor                | 2.66.0         |
| limma               | Linear models for microarray data              | 3.62.1         |
| tidyr               | 2.88                                           | 1.3.1          |
| dplyr               | 2.61                                           | 1.1.4          |
| stringr             | 2.60                                           | 1.5.1          |
| pheatmap            | Heatmap visualization                          | 1.0.12         |
| EnhancedVolcano     | Volcano plot visualization                     | 1.24.0         |
| multiMiR            | DE miRNA gene target identification            | 1.28.0         |
| clusterProfiler     | Analysis and visualization of gene enrichments | 4.14.3         |
| UpSetR              | Upset plot intersections and visualization     | 1.4.0          |
| pathview            | Pathway data visualization                     | 1.46.0         |
| org.Mm.eg.db        | Genome wide annotation for Mouse               | 3.20.0         |
| enrichplot          | Visualization of enrichment plots              | 1.27.2         |
| PCAtools            | PCA visualization                              | 2.18.0         |
| pd.mirna.4.0        | Platform design for miRNA 4.0                  | 3.12.0         |
| AnnotationDbi       | Manipulation of SQLite Annotations             | 1.68.0         |
